# Supplementary material for: Efficient predetermination of chirality-at-zirconium
Source: Royal Society of Chemistry journal article supplement (doi:10.1039/b205043a), 2002-01-01
Supplement: b205043a.pdf [file b205043a.pdf]

**Efficient predetermination of chirality-at-zirconium**

Ian J. Munslow, Adam J. Clarke, Robert J. Deeth,\* Ian Westmoreland and Peter Scott\*

*Department of Chemistry, University of Warwick, Coventry, CV4 7AL, UK.*

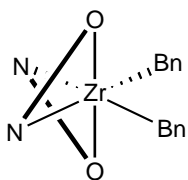

**OO1.pdb**

*Δ-trans,cis,cis*

See Scheme 1

See also ZrL2Bn2\_Xray.PDB

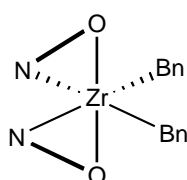

**OO2.pdb**

*Λ-trans,cis,cis*

See Scheme 1

+36 kJ mol<sup>-1</sup>

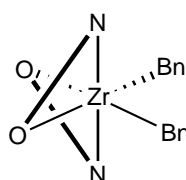

**NN1.pdb**

*Δ-cis,trans,cis*

+79.5 kJ mol<sup>-1</sup>

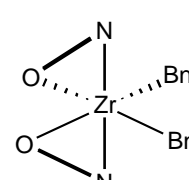

**NN2.pdb**

*Λ-cis,trans,cis*

+128.9 kJ mol<sup>-1</sup>

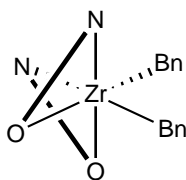

**NO1.pdb**

*Δ-cis,cis,cis*

+103.8 kJ mol<sup>-1</sup>

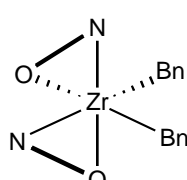

**NO2.pdb**

*Λ-cis,cis,cis*

+120.9 kJ mol<sup>-1</sup>

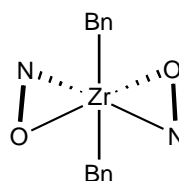

**trans1.pdb**

*trans,trans,trans*

+64.0 kJ mol<sup>-1</sup>

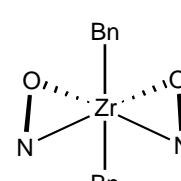

**trans2.pdb**

*cis,cis,trans*

+16.3 kJ mol<sup>-1</sup>

**Associated structure files (.pdb), configuration descriptors, and energies relative to the observed *Δ-trans,cis,cis*-[ZrL<sub>2</sub>(CH<sub>2</sub>Ph)<sub>2</sub>]**
